# Supplementary material for: A multiplex paper-based nanobiocatalytic system for simultaneous determination of glucose and uric acid in whole blood
Source: Royal Society of Chemistry journal article supplement (doi:10.1039/c8an00866c), 2018-01-01
Supplement: c8an00866c1.pdf [file c8an00866c1.pdf]

## **Electronic Supplementary Information**

### **A Multiplex Paper-Based Nanobiocatalytic System for Simultaneous Determination of Glucose and Uric Acid in Whole Blood**

Jin Huang, Xue-Li Zhu, Yu-Min Wang, Jian-Hui Ge, Jin-Wen Liu\* and Jian-Hui Jiang\*

Institute of Chemical Biology and Nanomedicine, State Key Laboratory of Chemo/Bio-Sensing  
and Chemometrics, College of Biology, College of Chemistry and Chemical Engineering, Hunan  
University, Changsha, Hunan 410082, P. R. China

\*Corresponding author:

Tel.: 86-731-88821916, Fax: 86-731-88821916

E-mail addresses: jinwenliu@hnu.edu.cn, jianhuijiang@hnu.edu.cn

**Fig. S1.** EDX of (A) GOx&HRP-Cu<sub>3</sub>(PO<sub>4</sub>)<sub>2</sub> HNFs, (B) UAO&HRP-Cu<sub>3</sub>(PO<sub>4</sub>)<sub>2</sub> HNFs.

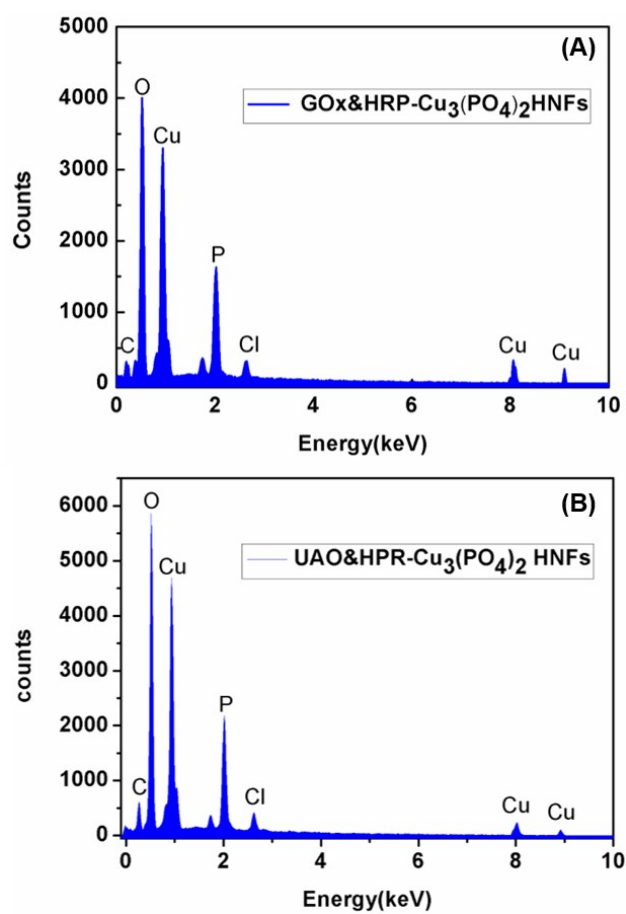

**Fig. S2.** XRD of (A)  $\text{Cu}_3(\text{PO}_4)_2$ , (B)  $\text{GO}_x\&\text{HRP-Cu}_3(\text{PO}_4)_2$  HNFs, (C)  $\text{UAO}\&\text{H RP-Cu}_3(\text{PO}_4)_2$  HNFs.

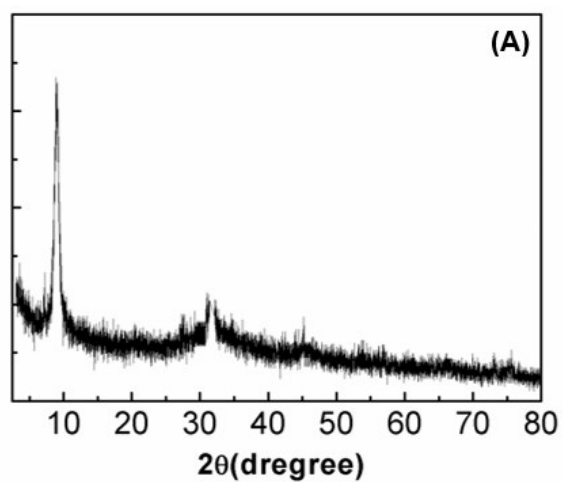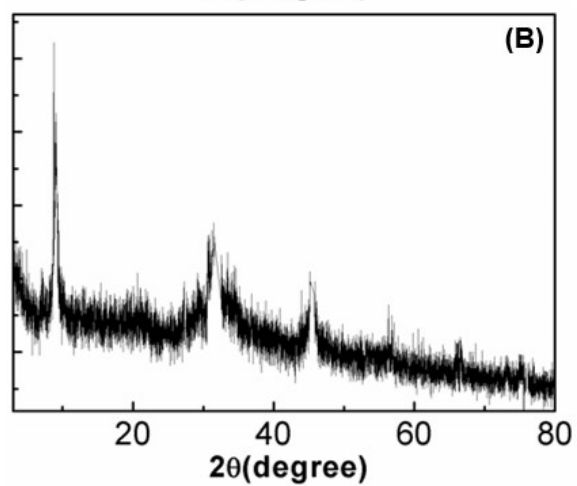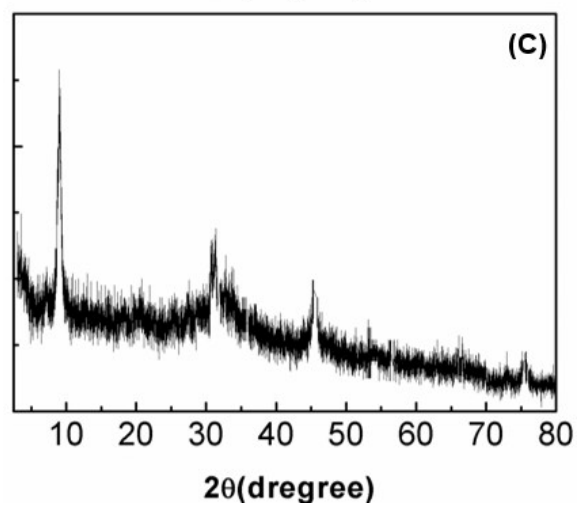

**Fig. S3.** SEM images of UAO&HRP-Cu<sub>3</sub>(PO<sub>4</sub>)<sub>2</sub> HNFs at different concentration of UAO (A) 0.0 mg·mL<sup>-1</sup>, (B) 0.5 mg·mL<sup>-1</sup>, (C) 1.0 mg·mL<sup>-1</sup> and (D) 2.0 mg·mL<sup>-1</sup>.

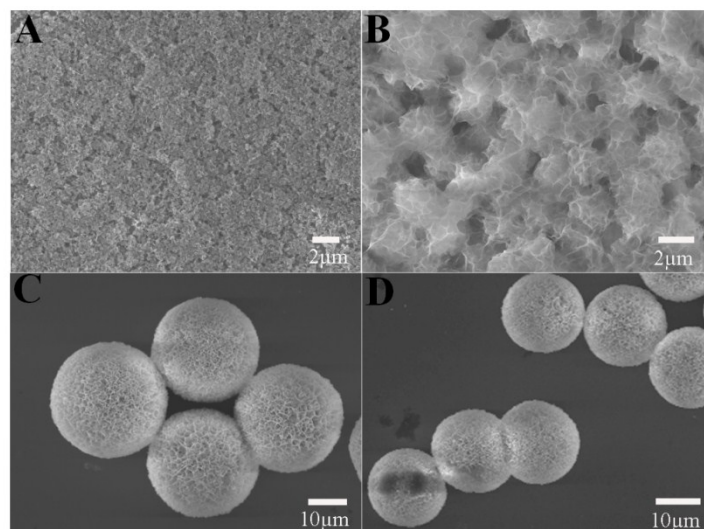

**Fig. S4.** Growing mechanism of UAO&HRP- $\text{Cu}_3(\text{PO}_4)_2$  HNFs. (A-F) SEM images of UAO&HRP- $\text{Cu}_3(\text{PO}_4)_2$  HNFs after growing for (A) 6 h, (B) 12 h, (C) 24 h, (D) 36 h, (E) 48 h and (F) 72 h. The diameter for nanoflowers obtained in different cases is about 4  $\mu\text{m}$ , 8  $\mu\text{m}$ , 12  $\mu\text{m}$ , 16  $\mu\text{m}$ , 20  $\mu\text{m}$  and 22  $\mu\text{m}$ , respectively.

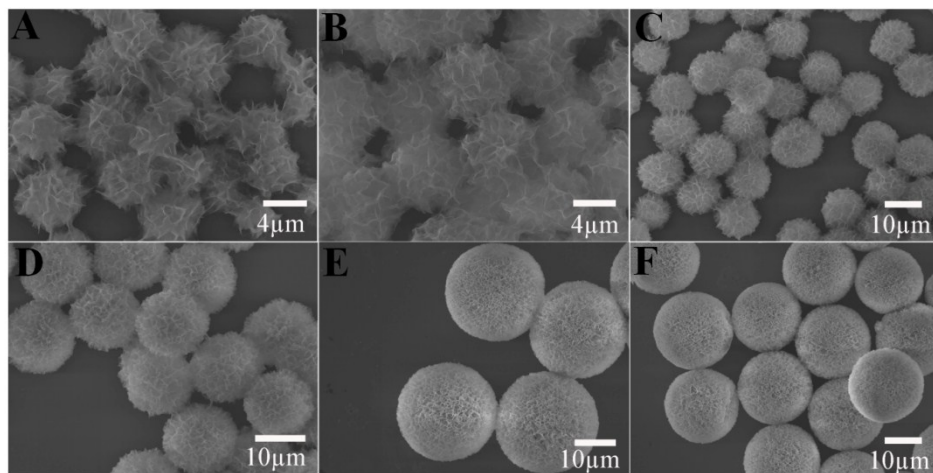

**Fig. S5.** SEM images of as-prepared UAO&HRP dual-enzyme hybrid nanoflowers in absence of  $\text{CuSO}_4$ .

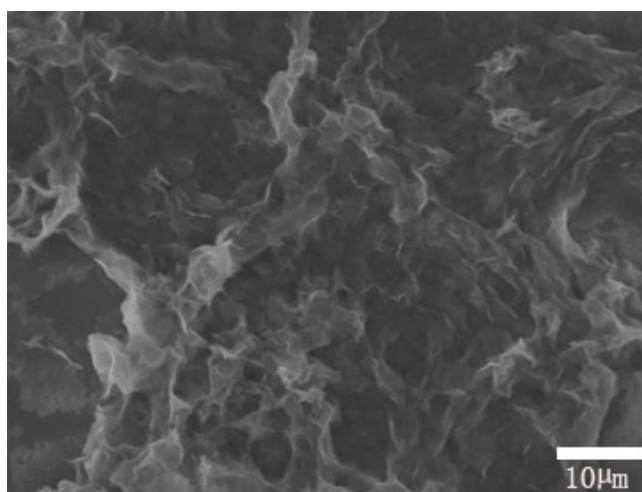

**Fig. S6.** Optimization of wax melting time of uPADs with duration of 30 s, 60 s, and 120 s for the front and the back.

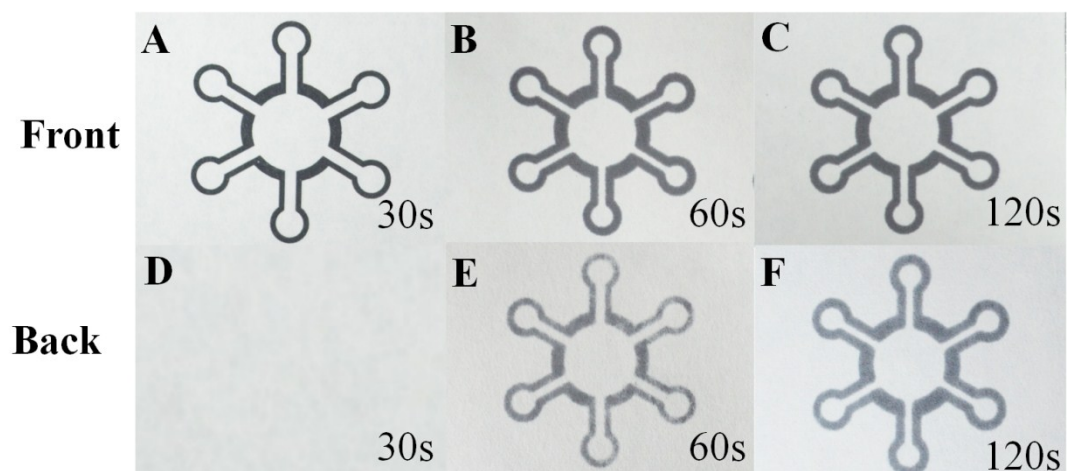

**Fig. S7.** Optimization of reagent volumes in detecting zone (A) and sample volumes in central zone (B, C, D). All channels were fabricated to be a 6 mm at length and 3 mm at width. And their diameter values for detection zone and central zones were 6 and 15 mm, respectively.

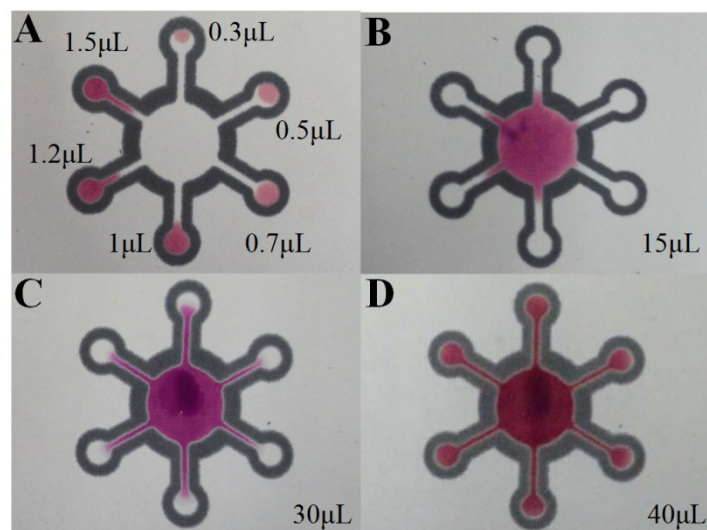



**Fig. S8.** Steady-state kinetics assay of free enzymes (without copper) and GOx&HRP- $\text{Cu}_3(\text{PO}_4)_2$  and UAOx&HRP- $\text{Cu}_3(\text{PO}_4)_2$  hybrid nanoflowers (HNFs). Reaction velocity are plotted with various glucose concentrations (A and C) and various uric acid concentrations (B and D).

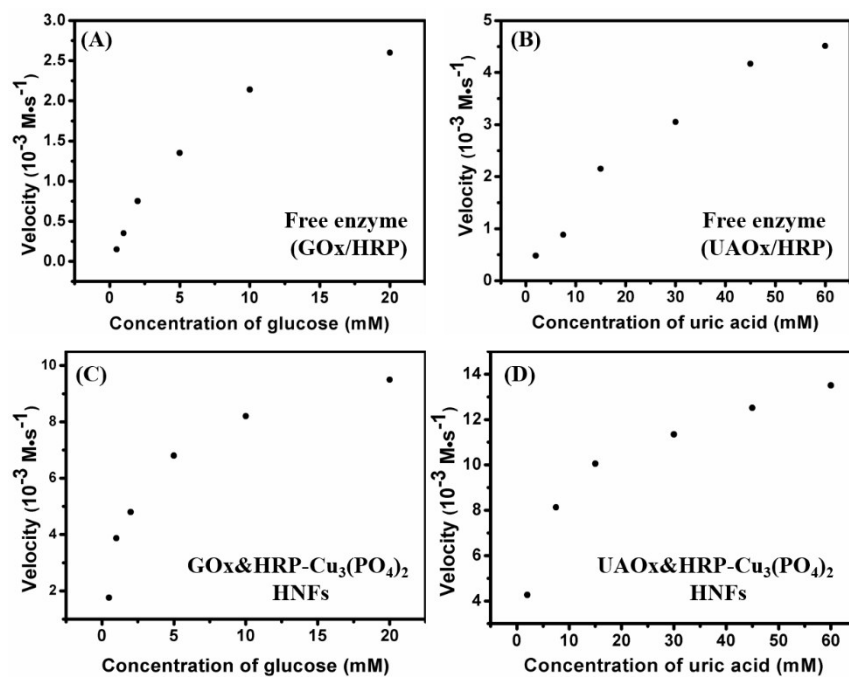

**Fig. S9.** Photograph of  $\mu$ PADs used for detection of 2 mM glucose and 2 mM uric acid with GOx&HRP- $\text{Cu}_3(\text{PO}_4)_2$  and UAOx&HRP- $\text{Cu}_3(\text{PO}_4)_2$  nanoflowers prepared using different reaction times. (A) 24 h, (B) 48 h.

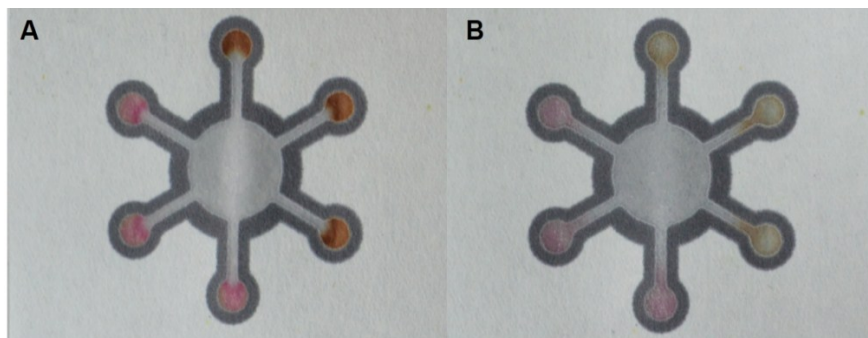

**Fig. S10.** (A) Effects of pH on the catalytic activities of GOx&HRP-Cu<sub>3</sub>(PO<sub>4</sub>)<sub>2</sub> (black column) and UAOx&HRP-Cu<sub>3</sub>(PO<sub>4</sub>)<sub>2</sub> HNFs (gray column); (B) Effects of different buffers on the catalytic activities of GOx&HRP-Cu<sub>3</sub>(PO<sub>4</sub>)<sub>2</sub> (black column) and UAOx&HRP-Cu<sub>3</sub>(PO<sub>4</sub>)<sub>2</sub> HNFs (gray column).

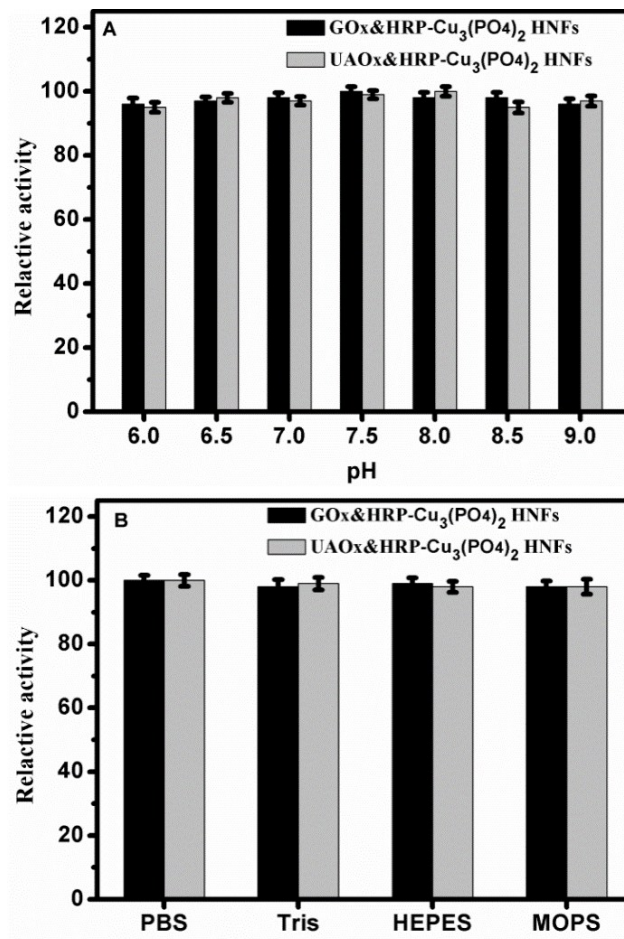

**Fig. S11.** Image of  $\mu$ PADs used for the detection of glucose and uric acid in the whole blood samples. The whole blood samples all were diluted 5 times for detection of glucose and uric acid.

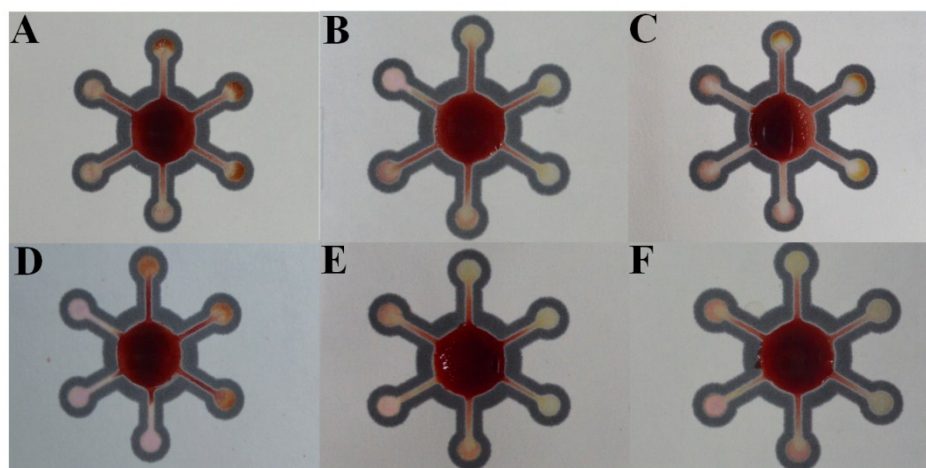

**Fig. S12.** Comparison of analysis performance of the nanoflower-based  $\mu$ PADs for glucose and uric acid detection in the whole blood (A) and serum samples (B). Before testing glucose and uric acid in serum sample, anticoagulant was first added in the same whole blood to prevent blood clotting and then serum sample was obtained by centrifugation.

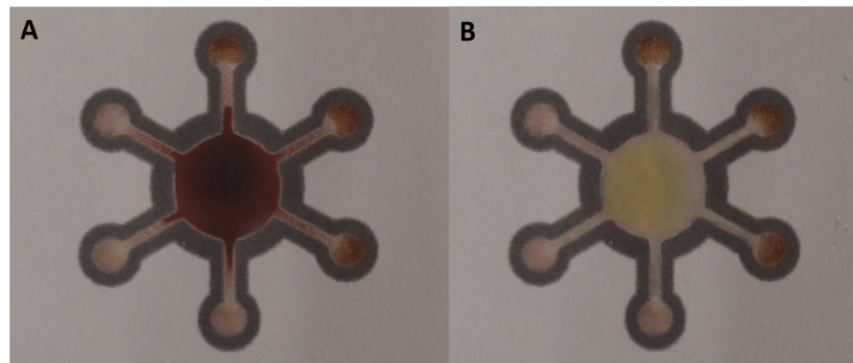

**Table S1.** Comparison of the apparent Michaelis-Menten constant ( $K_m$ ) and maximum reaction rate ( $V_{max}$ ) of the catalytic reaction between GOx&HRP-Cu<sub>3</sub>(PO<sub>4</sub>)<sub>2</sub> and UAOx&HRP-Cu<sub>3</sub>(PO<sub>4</sub>)<sub>2</sub> hybrid nanoflowers and free enzymes (without copper).

| Catalyst                                                      | Substrate | $K_m$ (mM) | $V_{max}$ (M/s)       |
|---------------------------------------------------------------|-----------|------------|-----------------------|
| Free enzyme (GOx/HRP)                                         | Glucose   | 5.5        | $3.3 \times 10^{-3}$  |
| GOx&HRP-Cu <sub>3</sub> (PO <sub>4</sub> ) <sub>2</sub> HNFs  | Glucose   | 1.7        | $9.5 \times 10^{-3}$  |
| Free enzyme (UAOx/HRP)                                        | Uric acid | 15.1       | $3.9 \times 10^{-3}$  |
| UAOx&HRP-Cu <sub>3</sub> (PO <sub>4</sub> ) <sub>2</sub> HNFs | Uric acid | 4.2        | $13.2 \times 10^{-3}$ |

**Table S2.** Effects of zeta potential on the catalytic activities of GOx&HRP-Cu<sub>3</sub>(PO<sub>4</sub>)<sub>2</sub> and UAOx&HRP-Cu<sub>3</sub>(PO<sub>4</sub>)<sub>2</sub> HNFs. “I” refers to the gray intensity response of the glucose or uric acid; “I<sub>0</sub>” refers to the gray intensity response of blank sample. The concentration of glucose and UA are 0.2 and 1mM, respectively.

| Dual-enzyme hybrid nanoflowers                               | Reaction Time (h) | Zeta potential (mV) | Catalytic activity ((I-I <sub>0</sub> )/I <sub>0</sub> ) |
|--------------------------------------------------------------|-------------------|---------------------|----------------------------------------------------------|
| GOx&HRP-Cu <sub>3</sub> (PO <sub>4</sub> ) <sub>2</sub> HNFs | 12                | -15.2               | 0.374                                                    |
|                                                              | 24                | -23.4               | 0.517                                                    |
|                                                              | 36                | -16.72              | 0.439                                                    |
|                                                              | 48                | -15.97              | 0.396                                                    |
| UAO&HRP-Cu <sub>3</sub> (PO <sub>4</sub> ) <sub>2</sub> HNFs | 12                | -6.73               | 0.386                                                    |
|                                                              | 24                | -8.81               | 0.547                                                    |
|                                                              | 36                | -6.9                | 0.456                                                    |
|                                                              | 48                | -5.92               | 0.332                                                    |

**Table S3.** Comparison of analytical performance of some assays for glucose and uric acid detection.

| Analysis methods                            | Object                        | Sensing time | Sensing range   | LOD           | References       |
|---------------------------------------------|-------------------------------|--------------|-----------------|---------------|------------------|
| Electrochemical analysis                    | glucose                       | Not given    | Not given       | 100 nM        | S1               |
|                                             | uric acid                     | Not given    | Not given       | 100 nM        |                  |
| Electrochemical analysis                    | glucose                       | Not given    | 0.08–5 mM       | 0.03 mM       | S2               |
|                                             | H <sub>2</sub> O <sub>2</sub> | Not given    | 0.075–10 mM     | 0.041 mM      |                  |
| Electrochemical analysis                    | glucose                       | 3–4 s        | 2.25–30 mM      | 2.25 mM       | S3               |
|                                             | uric acid                     | 4–5 s        | 400–930 $\mu$ M | 400 $\mu$ M   |                  |
| Electrochemical analysis                    | glucose                       | Not given    | 0–1 mM          | 0.18 mM       | S4               |
|                                             | uric acid                     | Not given    | 0–1 mM          | 0.11 mM       |                  |
| Electrochemical analysis                    | glucose                       | Not given    | 0.42–50 mM      | 0.14 mM       | S5               |
|                                             | uric acid                     | Not given    | 1.4–47 mM       | 0.52 mM       |                  |
| Colorimetry analysis                        | glucose                       | Not given    | 4.5–5.8 mM      | 23 $\mu$ M    | S6               |
|                                             | uric acid                     | Not given    | 130–380 $\mu$ M | 37 $\mu$ M    |                  |
| Colorimetry analysis                        | glucose                       | 30 min       | 0.3–1.0 mM      | 0.213 mM      | S7               |
|                                             | uric acid                     | 30 min       | 0.3–1.0 mM      | 0.287 mM      |                  |
| Colorimetry analysis                        | glucose                       | Not given    | 0–12 mM         | 0.7 mM        | S8               |
|                                             | uric acid                     | Not given    | 0–5 mM          | 0.3 mM        |                  |
| Colorimetry analysis                        | glucose                       | 10 min       | 0.5–20 mM       | 0.5 mM        | S9               |
|                                             | uric acid                     | 10 min       | 0.1–7 mM        | 0.1 mM        |                  |
| FRET probes                                 | glucose                       | 10 min       | 0.1–1.0 $\mu$ M | 0.05 mM       | S10              |
|                                             | uric acid                     | 10 min       | 25–500 nM       | 0.025 mM      |                  |
| GQDs-based fluorescent probe                | glucose                       | 60 min       | 0.1–30 $\mu$ M  | 0.021 $\mu$ M | S11              |
|                                             | uric acid                     | 60 min       | 0.1–45 $\mu$ M  | 0.026 $\mu$ M |                  |
| Microfluidic thread-based analytical device | glucose                       | 10 min       | 1.0–100 $\mu$ M | 0.1 $\mu$ M   | S12              |
|                                             | uric acid                     | 10 min       | 10–100 $\mu$ M  | 3 $\mu$ M     |                  |
| Paper-based nanobiocatalytic system         | glucose                       | 5 min        | 0.1–2 mM        | 60 $\mu$ M    | <i>This work</i> |
|                                             | uric acid                     | 5 min        | 0.1–10 mM       | 25 $\mu$ M    |                  |



**Table S4.** Stability of our devices was kept at room temperature (25 °C). Background signals were obtained by spotting 0.1 M phosphate buffer solution while standard test signals were obtained by spotting 2 mM glucose and 8 mM uric acid. The grayscale values were used to analyze the color intensity and gradient by Image J software.

| Standard test      | Storage for 8 days at room temperature (25 °C)                                      |                                                                                     | Storage for 12 days at room temperature (25 °C)                                      |                                                                                       |
|--------------------|-------------------------------------------------------------------------------------|-------------------------------------------------------------------------------------|--------------------------------------------------------------------------------------|---------------------------------------------------------------------------------------|
|                    | Image of $\mu$ PADs                                                                 | Grayscale image                                                                     | Image of $\mu$ PADs                                                                  | Grayscale image                                                                       |
| Standard sample I  | 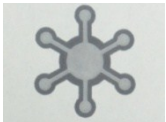   |    |    |    |
| Hybird nanoflowers |  |  |  |  |
| Standard sample II |  |  |  |  |
| Free GOx and HRP   |  |  |  |  |

**Table S5.** The simultaneous detection of glucose and uric acid in human whole blood.

| Samples        |           | Certified<br>concentration (mM) | Our propped<br>method (mM) | RSD (n=3,<br>%) |
|----------------|-----------|---------------------------------|----------------------------|-----------------|
| Blood sample A | glucose   | 9.87                            | 9.81                       | 3.1             |
|                | uric acid | 0.23                            | 0.19                       | 3.5             |
| Blood sample B | glucose   | 3.50                            | 3.22                       | 4.1             |
|                | uric acid | 0.46                            | 0.41                       | 3.6             |
| Blood sample C | glucose   | 6.42                            | 6.34                       | 3.4             |
|                | uric acid | 0.35                            | 0.38                       | 3.0             |
| Blood sample D | glucose   | 7.23                            | 7.15                       | 3.6             |
|                | uric acid | 0.29                            | 0.25                       | 4.5             |
| Blood sample E | glucose   | 2.30                            | 2.92                       | 3.3             |
|                | uric acid | 0.33                            | 0.34                       | 3.5             |
| Blood sample F | glucose   | 3.50                            | 3.18                       | 4.2             |
|                | uric acid | 0.58                            | 0.54                       | 3.2             |

## Notes and references

- [S1] C. Xiong, T. Zhang, W. Kong, Z. Zhang, H. Qu, W. Chen, Y. Wang, L. Luo and L. Zheng, *Biosens. Bioelectron.*, 2018, **101**, 21-28.
- [S2] C. Liu, D. Wang and C. Zhang, *Sens. Actuators B*, 2018, **270**, 341-352.
- [S3] Guo J, Ma X. *Biosens. Bioelectron.*, 2017, **94**, 415-419.
- [S4] W. Xu, K. Fu and P. W. Bohn, *ACS Sens.*, 2017, **2**, 1020-1026.
- [S5] J. Yu, L. Ge, J. Huang, S. Wang and S. Ge, *Lab Chip*, 2011, **11**, 1286-1291.
- [S6] E. F. Gabriel, P. T. Garcia, T. M. Cardoso, F. M. Lopes, F. T. Martins and W. K. Coltro, *Analyst*, 2016, **141**, 4749-4756.
- [S7] X. Chen, J. Chen, F. Wang, X. Xiang, M. Luo, X. Ji and Z. He, *Biosens. Bioelectron.*, 2012, **35**, 363-368.
- [S8] P. de Tarso Garcia, T. M. G. Cardoso, C. D. Garcia, E. Carrilho and W. K. T. Coltro, *RSC Adv.*, 2014, **4**, 37637-37644.
- [S9] W. Dungchai, O. Chailapakul and C. S. Henry, *Anal. Chim. Acta.*, 2010, **674**, 227-233.
- [S10] X. Huang, T. Lan, B. Zhang and J. Ren, *Analyst*, 2012, **137**, 3659-3666.
- [S11] H. Liu, X. Li, M. Wang, X. Chen and X. Su, *Anal. Chim. Acta.*, 2017, **990**, 150-156.
- [S12] F. Lu, Q. Mao, R. Wu, S. Zhang, J. Du and J. Lv, *Lab Chip*, 2015, **15**, 495-503.
